# Supplementary material for: Sex Differences of Human Cardiac Progenitor Cells in the Biological Response to TNF-α Treatment
Source: Stem Cells Int. 2017 Sep 17;2017:4790563. doi: 10.1155/2017/4790563 (PMC5623773; doi:10.1155/2017/4790563)

**SUPPLEMENTARY MATERIAL**

**Sex differences of human cardiac progenitor cells in the biological response to TNF-α treatment**

Elisabetta Straface*1, Lucrezia Gambardella1, Francesca Pagano2, Francesco Angelini2, Barbara Ascione1, Rosa Vona1, Elena De Falco2, Elena Cavarretta2, Raffaele La Russa3,4, Walter Malorni1#, Giacomo Frati2,5#, Isotta Chimenti2#.

1Center for Gender-Specific Medicine, Istituto Superiore di Sanità, Italy

2Department of Medical Surgical Sciences and Biotechnologies, “La Sapienza” University of Rome, Italy.

3Department of Anatomical, Histological, Forensic and Orthopaedic Sciences, Sapienza University of Rome, Viale Regina Elena 336, 00185 Rome, Italy;

4Malzoni Clinical-Scientific Institute (MaCSI), Via Carmelo Errico 2, 83100 Avellino, Italy;

5Department of AngioCardioNeurology, IRCCS Neuromed, Pozzilli, Italy.

#These authors equally contributed.

**Supplementary figure 1.** Gene expression levels for a selected panel of cardiovascular and mesenchymal markers (A) and for NADPH-oxidase (NOX) isoforms (B) in cardiosphere-derived cells (CDCs) from female or male donors (n=6 each). Data is plotted as 2^-ΔCt, using GAPDH as the housekeeping gene, and presented as mean +/- standard error of the mean.


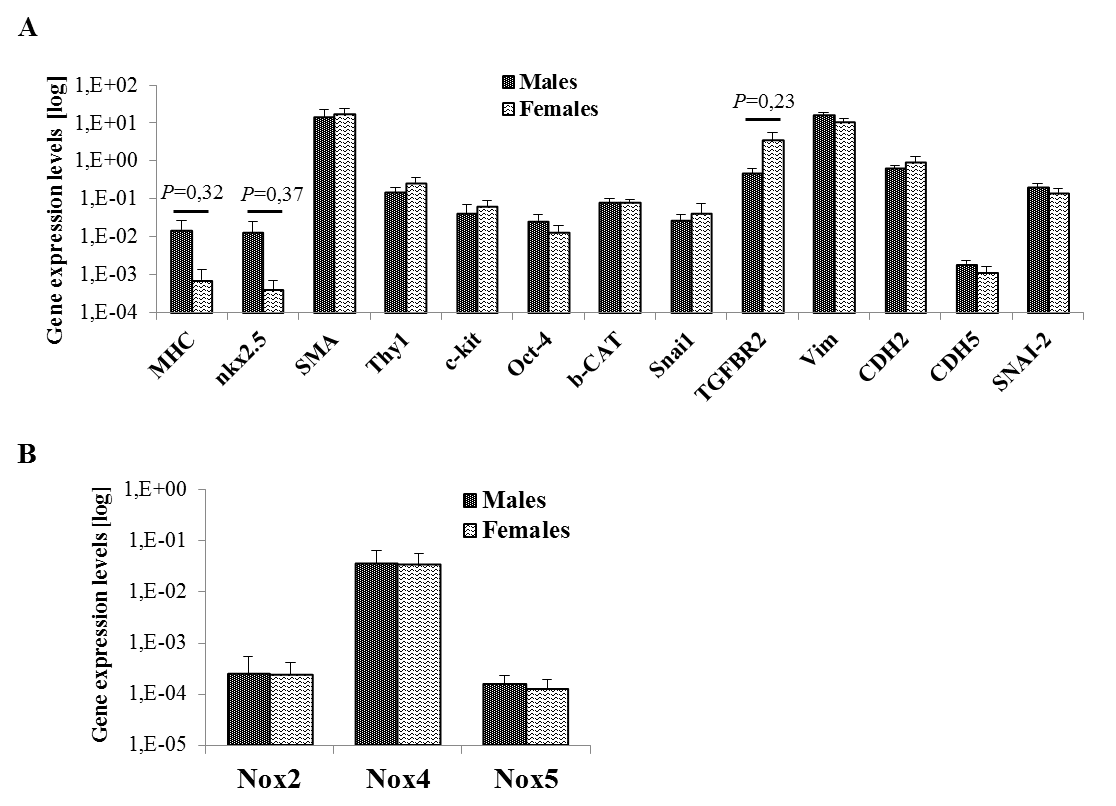

Supplement: Supplementary file 1 — Supplementary figure 1. Gene expression levels for a selected panel of cardiovascular and mesenchymal markers (A) and for NADPH-oxidase (NOX) isoforms (B) in cardiosphere-derived cells (CDCs) from female or male donors (n=6 each). Data is plotted as 2^-ΔCt, using GAPDH as the housekeeping gene, and presented as mean +/− standard error of the mean. [file 4790563.f1.docx]
